# Supplementary material
Source: Copernicus journal article supplement (doi:10.5194/nhess-26-2269-2026)
Supplement: Supplementary file 1 [file nhess-26-2269-2026-supplement.pdf]

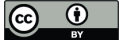

*Supplement of*

## **Projections of changes in extreme storm surges for European coasts using statistical downscaling**

**Maialen Irazoqui Apecechea et al.**

*Correspondence to:* Maialen Irazoqui Apecechea ([mirazoki@mercator-ocean.fr](mailto:mirazoki@mercator-ocean.fr))

The copyright of individual parts of the supplement might differ from the article licence.

# Supplementary Materials

Table S1 CMIP6 global climate models employed for ensemble storm surge projections. Zonal and meridional winds at 10-meters are available at 3-hourly frequency, while atmospheric pressure is available at 6-hourly frequency, except for the MPI models which provide 3-hourly frequency.

5

| CMIP6 model     | Resolution (lon x lat, <i>degrees</i> ) |
|-----------------|-----------------------------------------|
| MPI-ESM1-2-HR   | 0.9375 x 0.9375                         |
| CNRM-CM6-1-HR   | 0.5 x 0.5                               |
| EC-Earth3       | 0.7 x 0.7                               |
| HadGEM3-GC31-MM | 0.833 x 0.556                           |
| BCC-CSM2-MR     | 1.125 x 1.125                           |
| CMCC-CM2-SR5    | 1.25 x 0.9375                           |
| KIOST-ESM       | 1.875 x 1.875                           |
| MIROC6          | 1.4 x 1.4                               |
| NESM3           | 1.875 x 1.875                           |
| MRI-ESM2-0      | 1.125 x 1.125                           |
| CMCC-ESM2       | 1.4x1.4                                 |
| HadGEM3-GC3-LL  | 1.875 x 1.25                            |
| ACCESS-CM2      | 1.9 x 1.3                               |
| IPSL-CM6A-LR    | 1.25 x 2.5                              |
| CNRM-CM6-1      | 1.4 x 1.4                               |
| MIROC-ES2H      | 1.4 x 1.4                               |
| MPI-ESM1-2-LR   | 1.875 x 1.875                           |

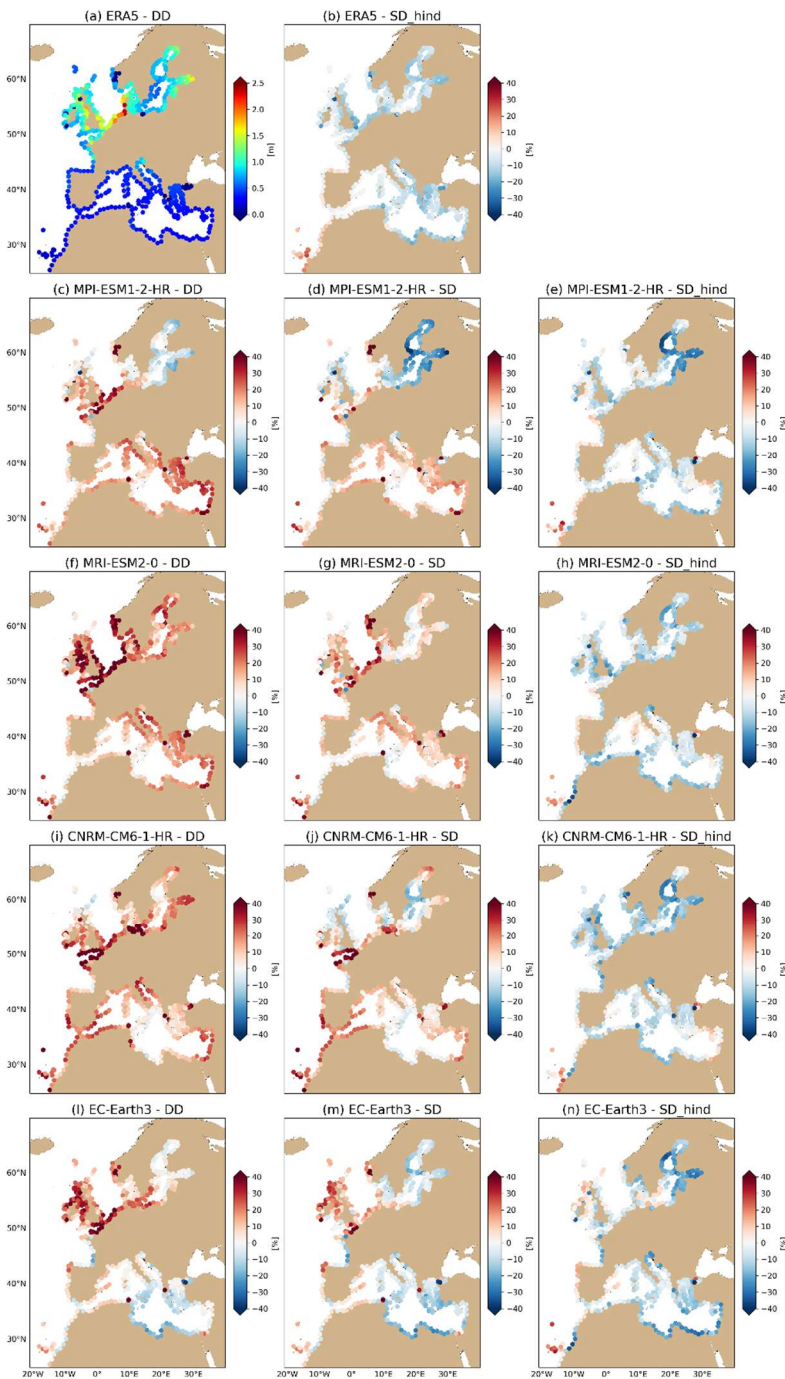

Figure S1 Validation against the hindcast dynamical simulation (panel a) of the 10-year storm surge return level from historical storm surge climate simulations: using the dynamical ensemble (c,f,i,l), using the statistical downscaling model (SDM) trained in the historical period for each GCM (d,g,k,m) and the SDM trained in the hindcast simulation (e,h,k,n). All pannels indicate relative differences [%] with the hindcast (panel a). Return levels are derived via stationary extreme value analysis on 1995-2014 for all experiments except for the dynamically downscaled hindcast, for which a slightly different 20-yr period is used based on the simulation coverage (1997-2016). The SDM reconstruction of the hindcast simulation (b) is added for reference.

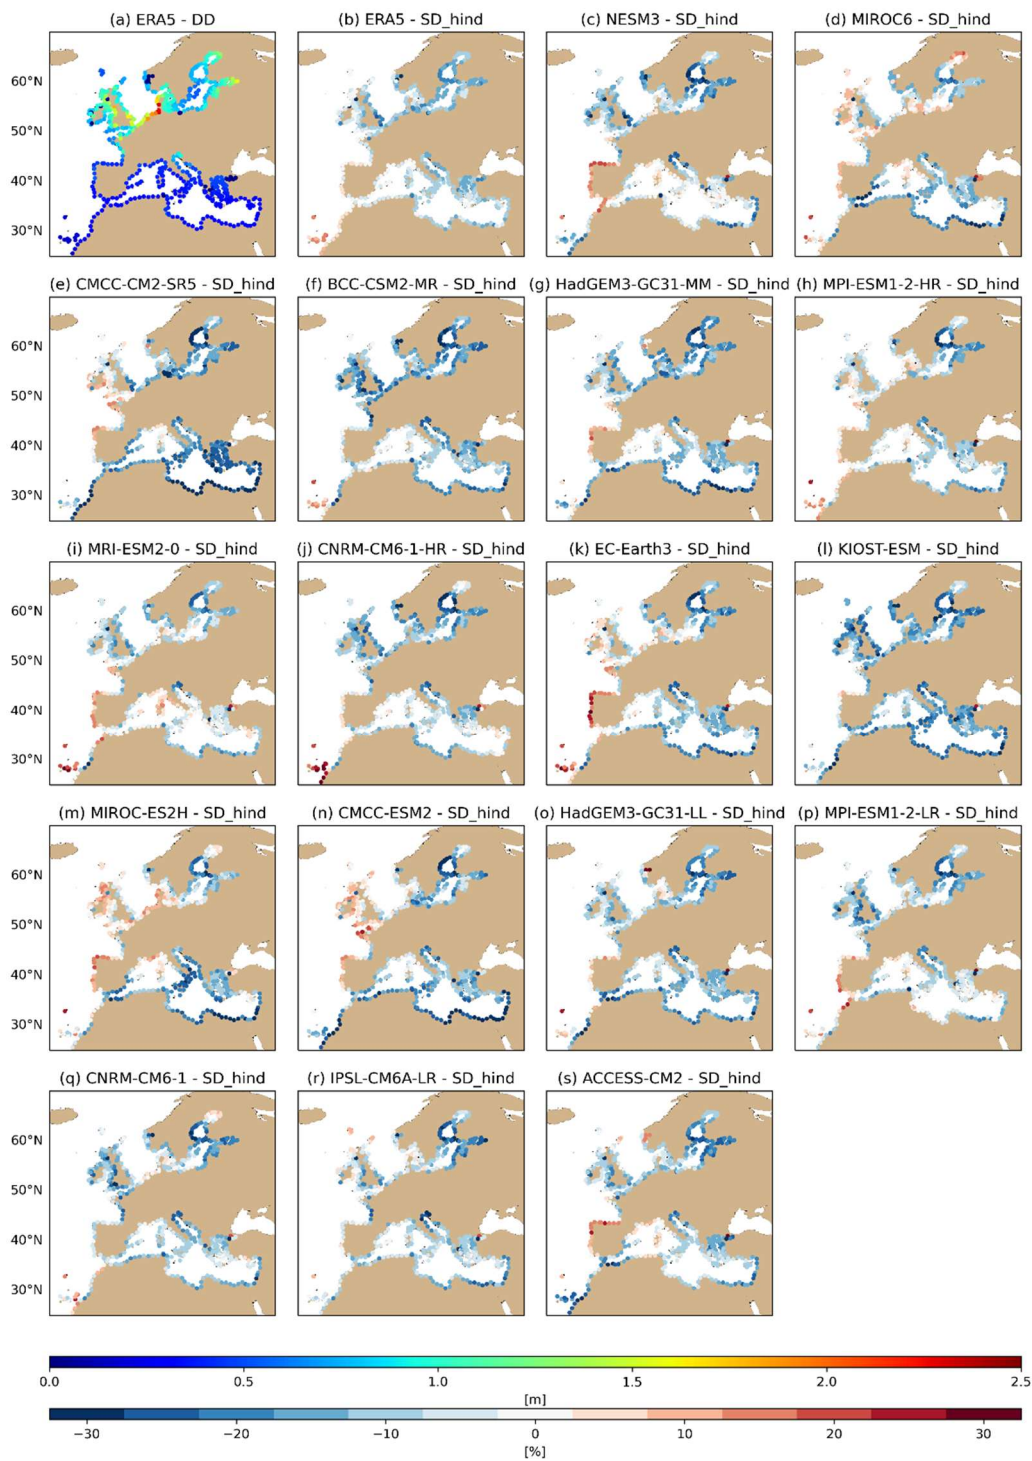

15 **Figure S2 Validation against the hindcast dynamical simulation (a) of the 10-year storm surge return level (stationary EVA on 30 years, 1985-2014) from statistical storm surge estimates for historical climates for each GCM in the 17-model ensemble. All panels indicate relative differences [%] relative to the hindcast (a).**

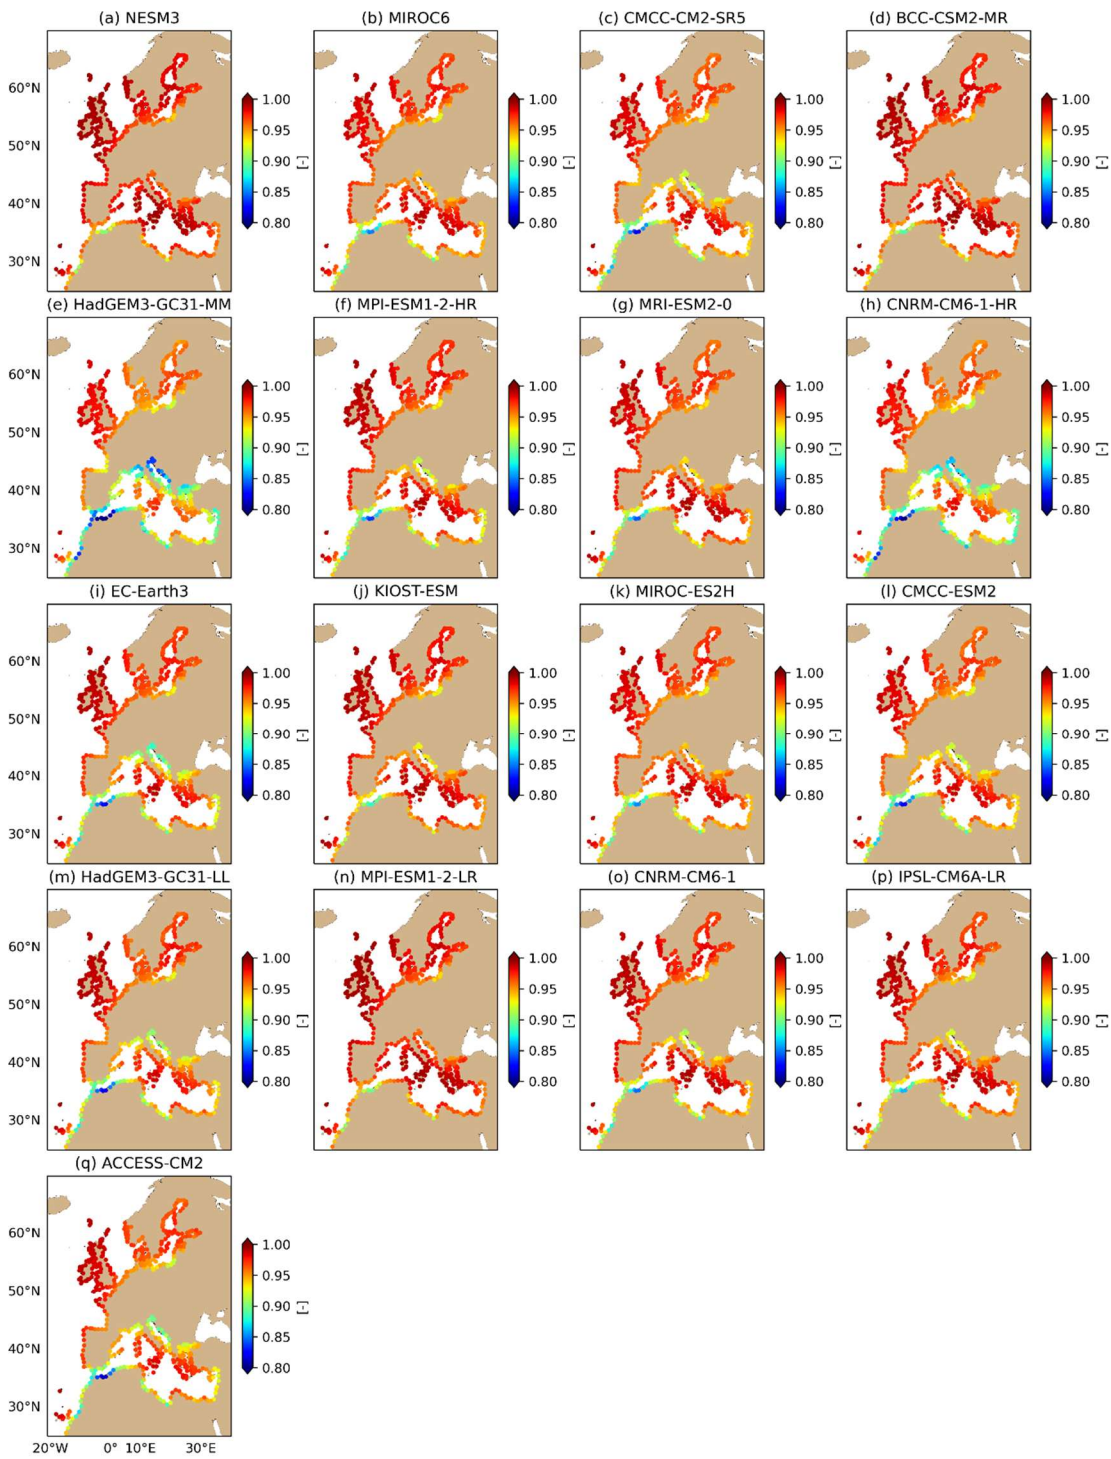

Figure S3 Explained total variance in the period 1995-2014 by the principal components resulting from the projection of the bias-corrected CMIP6 GCM atmospheric fields onto the empirical orthogonal functions (EOF) identified from training the statistical downscaling model on the hindcast simulation ( $SD_{hind}$ , i.e. EOFs extracted for the ERA5 reanalysis in 1997-2021).

20

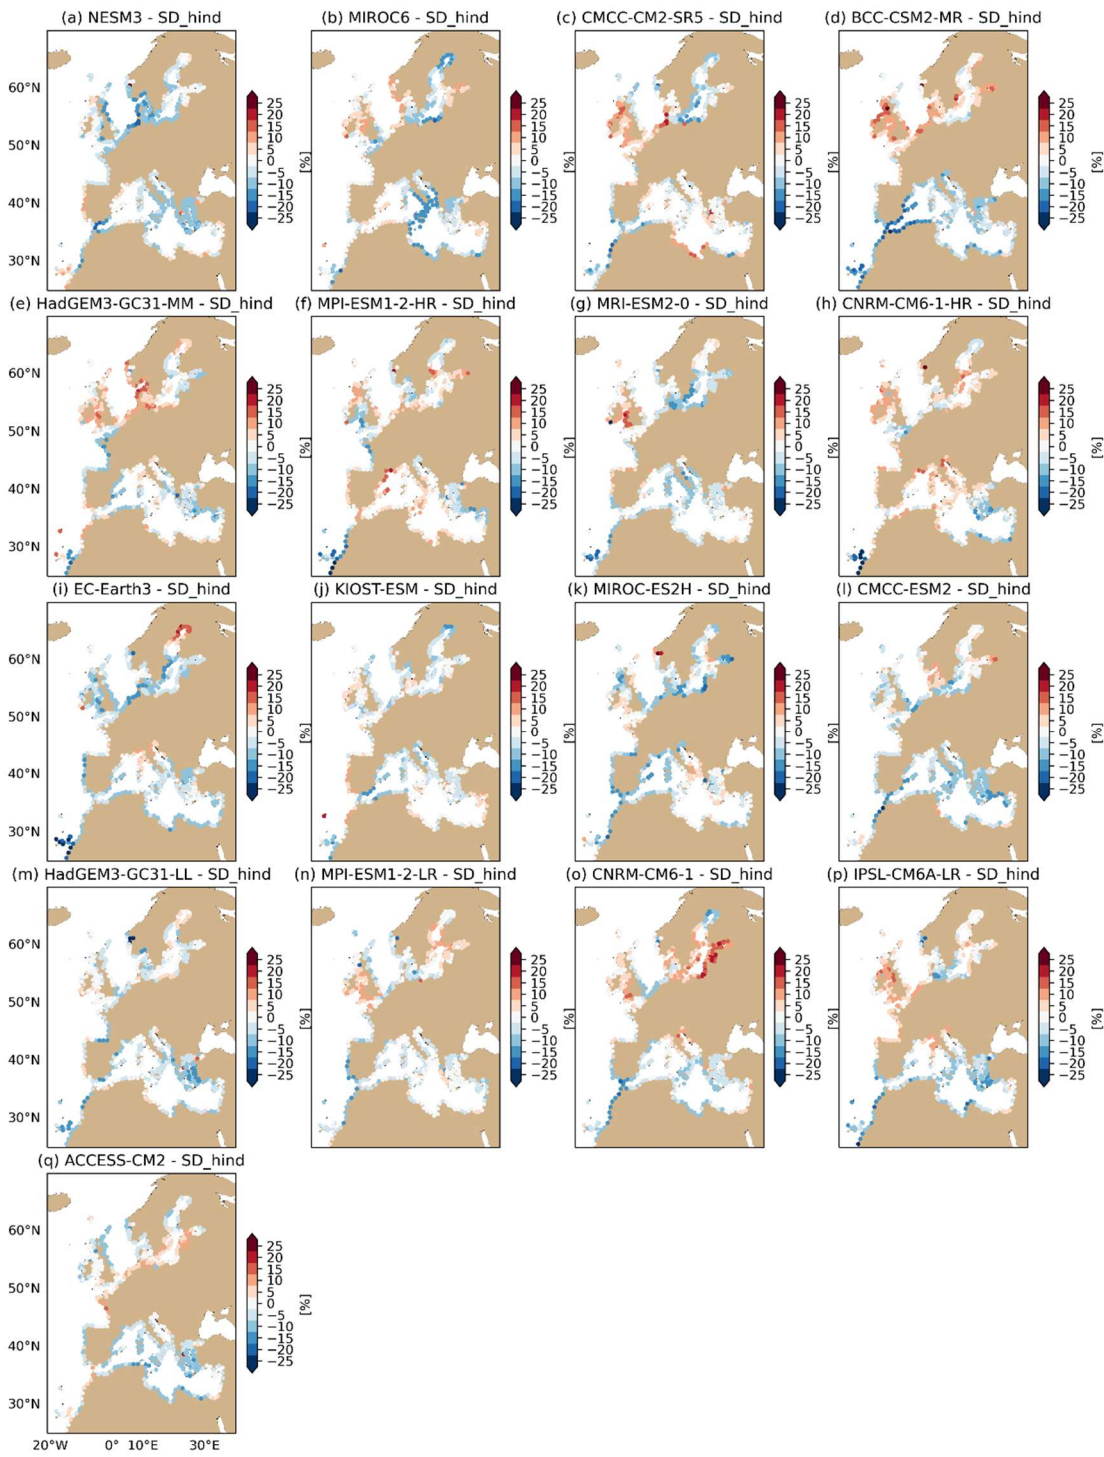

**Figure S4** Projections of changes [%] in the storm surge 10-year return level for the middle of the 21st century (stationary extreme value analysis on [2035-2064] vs [1985-2014]) for each of the 17 GCM models in the ensemble.

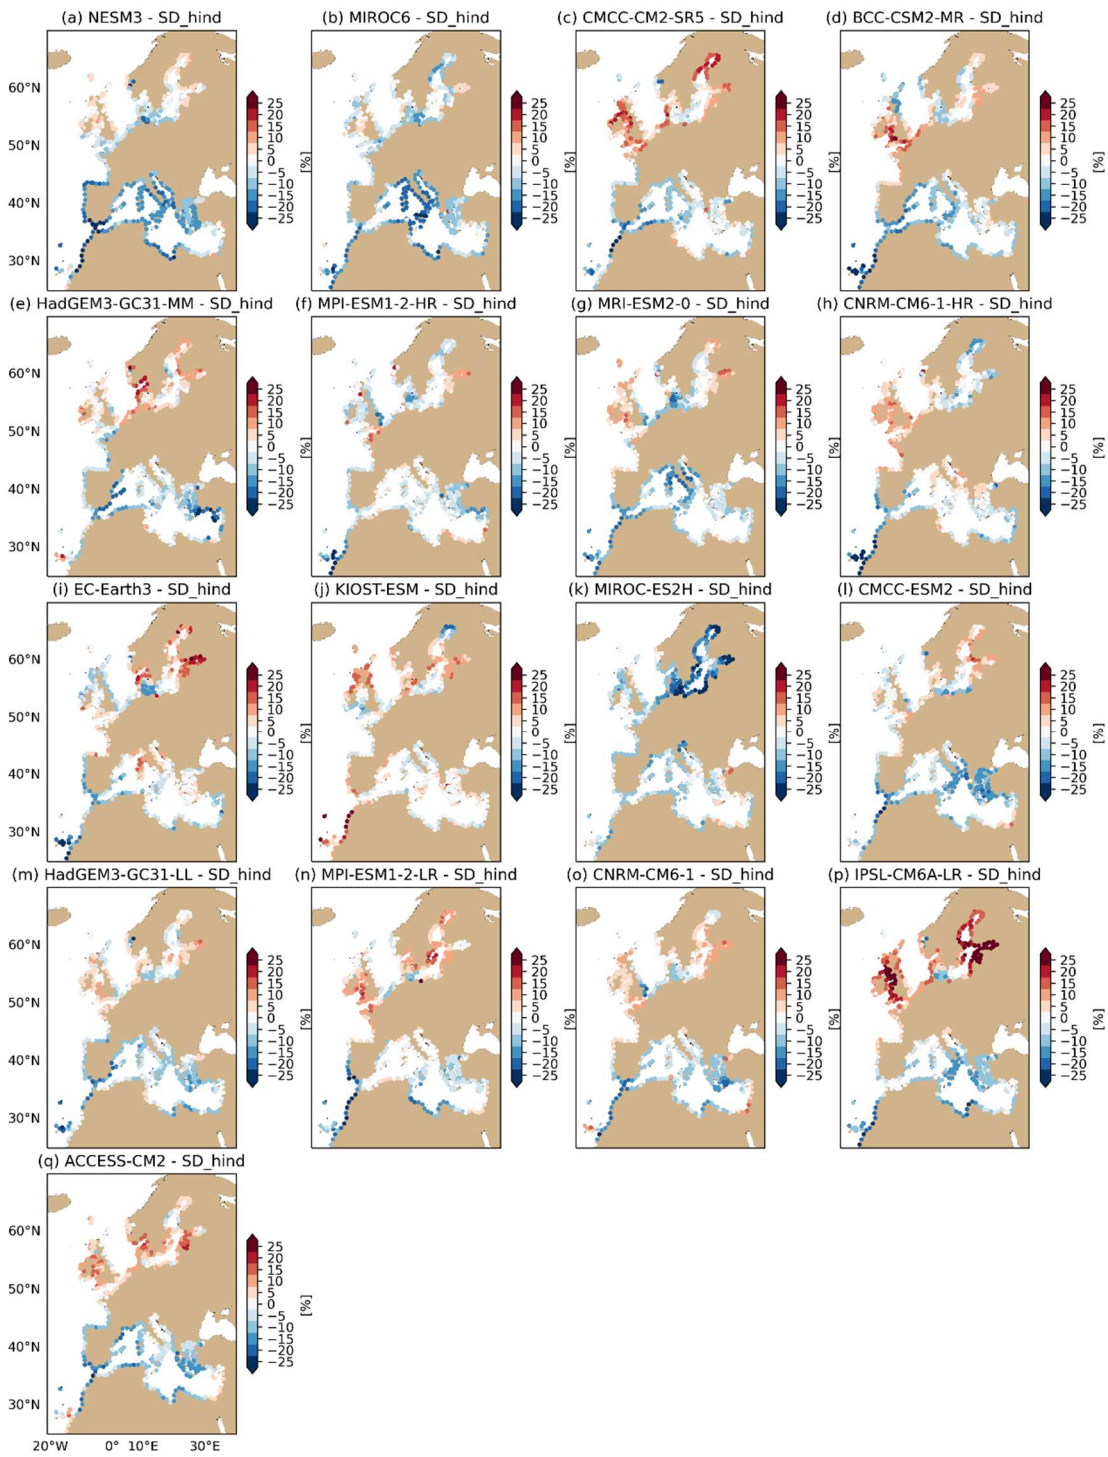

25 **Figure S5** Projections of changes [%] in the storm surge 10-year return level for the end of the 21st century (stationary extreme value analysis on [2070-2099] vs [1985-2014]) for each of the 17 GCM models in the ensemble.

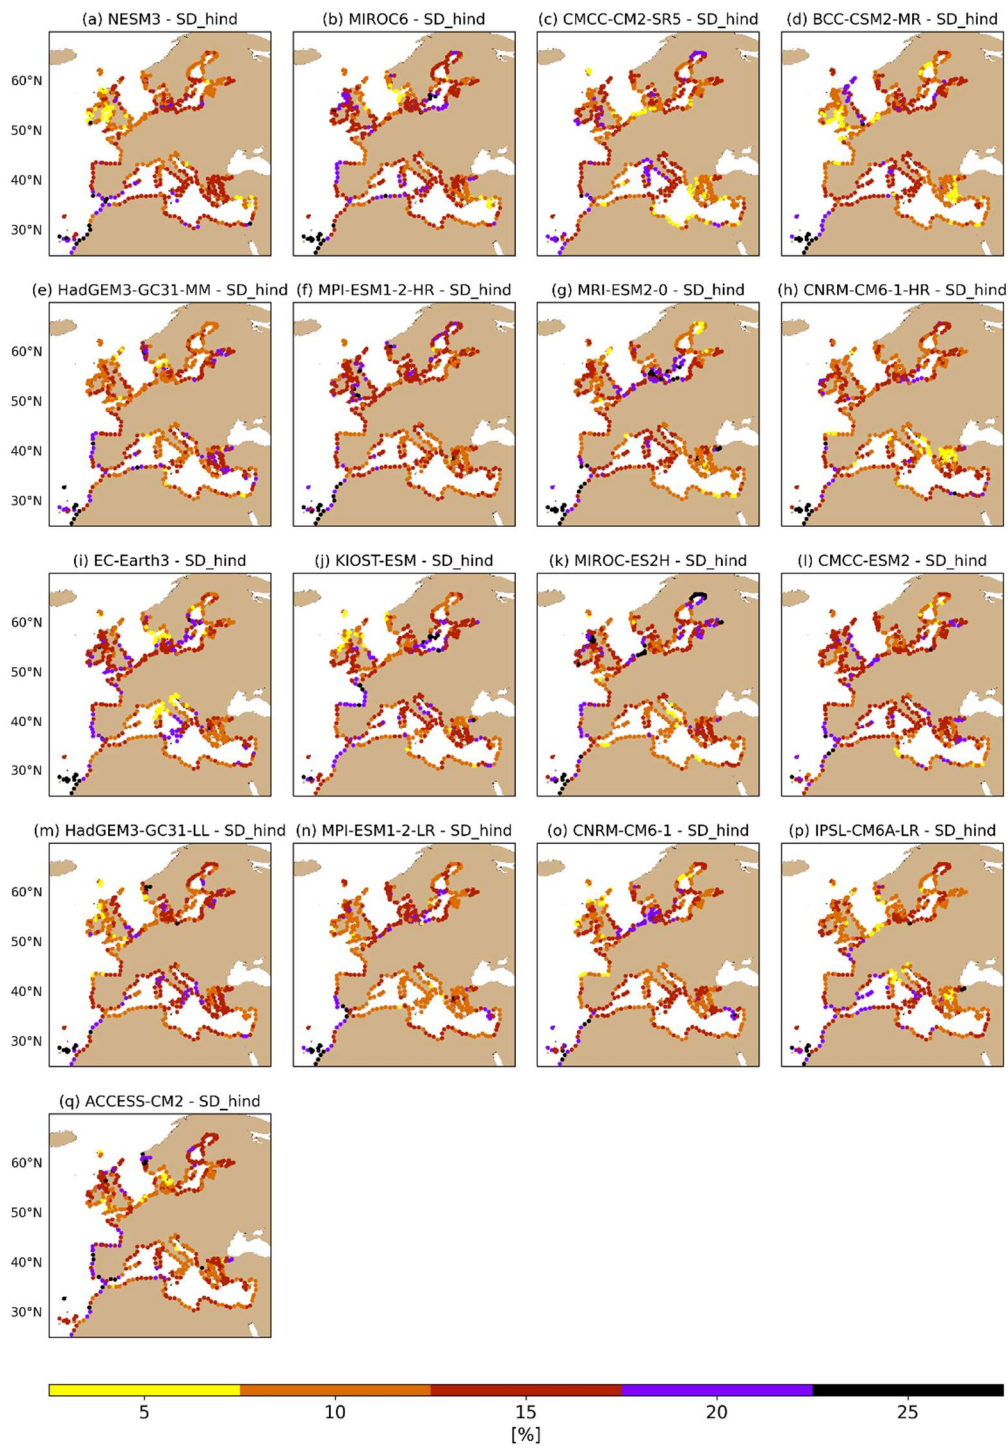

30 **Figure S6** Relative confidence interval (95<sup>th</sup> – 5<sup>th</sup> percentiles) for the 10-year storm surge return level in the historical climate (stationary extreme value analysis on 1985-2014) for each of the 17 GCM models in the statistical ensemble. Confidence intervals are produced using mean-adjusted bootstrap with replacement (600 iterations).

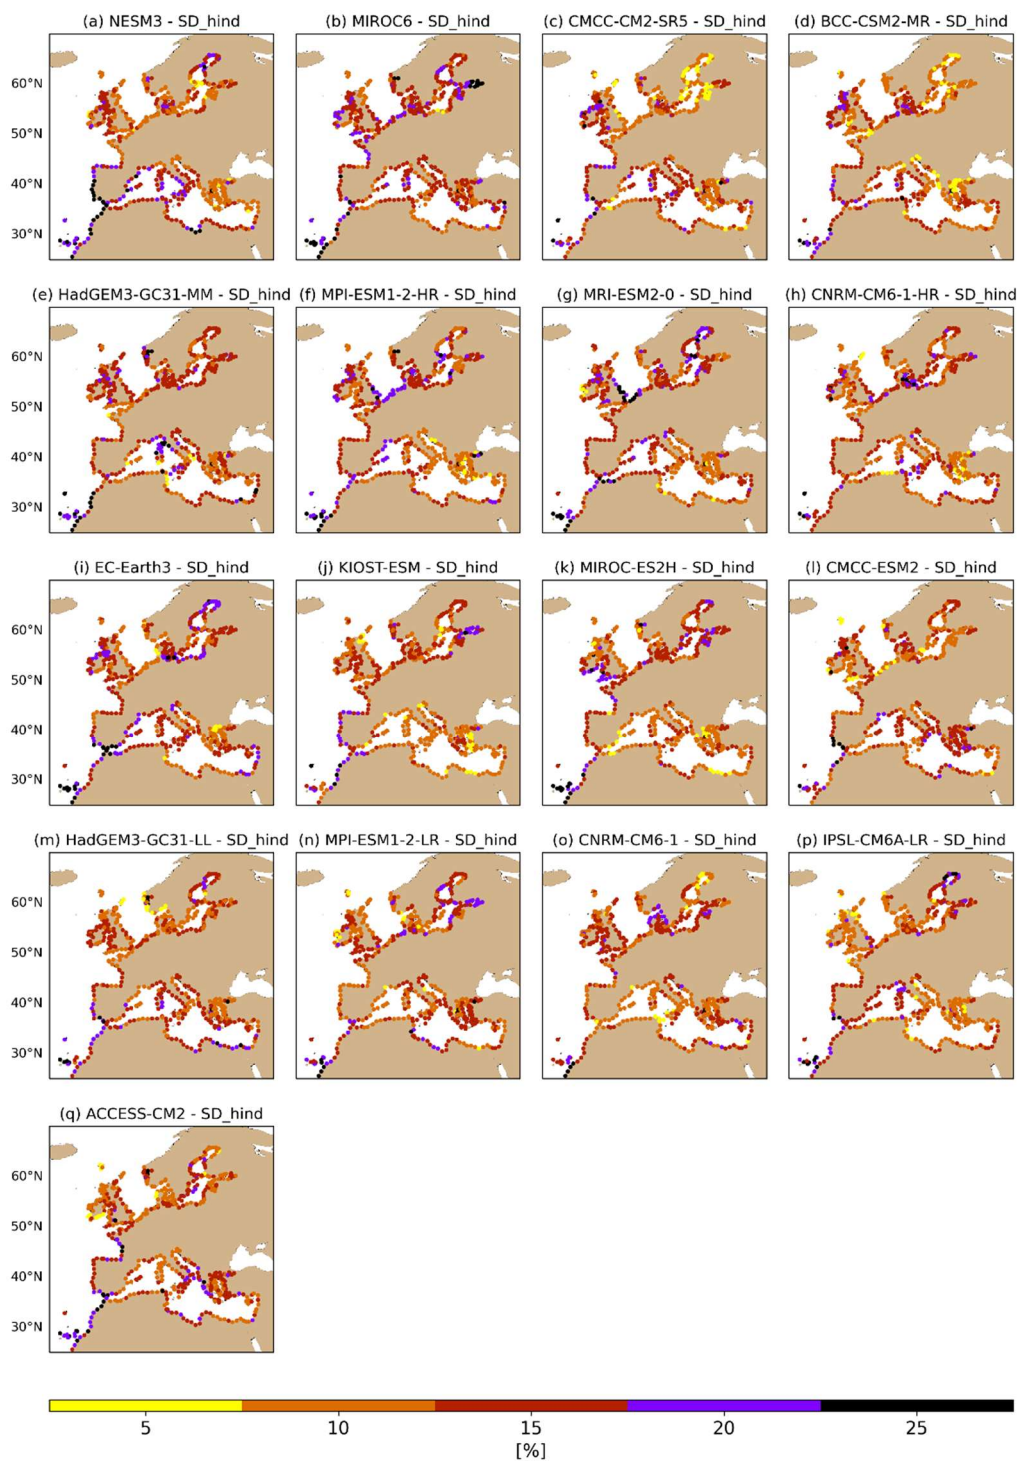

**Figure S7** Relative confidence interval width (95<sup>th</sup> – 5<sup>th</sup> percentiles, %) for the 10-year storm surge return level in the middle of the 21st century for SSP5-8.5 (stationary extreme value analysis on 2035-2064) for each of the 17 GCM models in the statistical ensemble. Confidence intervals are produced using mean-adjusted bootstrap with replacement (600 iterations).

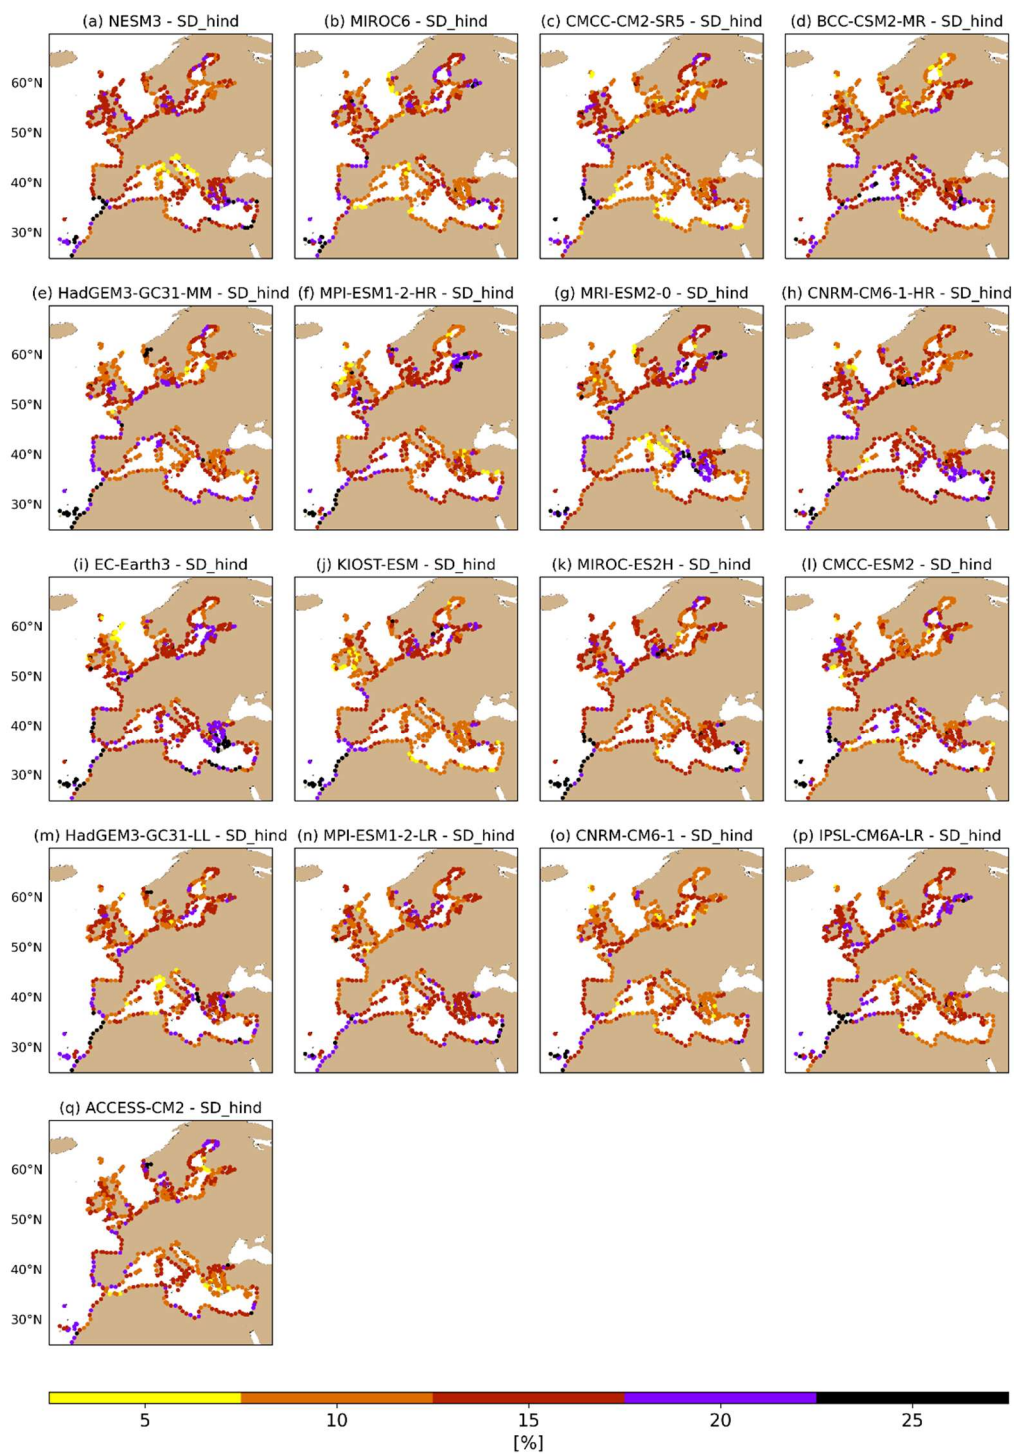

35

**Figure S8** Relative confidence interval width (95<sup>th</sup> – 5<sup>th</sup> percentiles, %) for the 10-year storm surge return level in the end of the 21st century for SSP5-8.5 (stationary extreme value analysis on 2070-2099) for each of the 17 GCM models in the statistical ensemble. Confidence intervals are produced using mean-adjusted bootstrap with replacement (600 iterations).

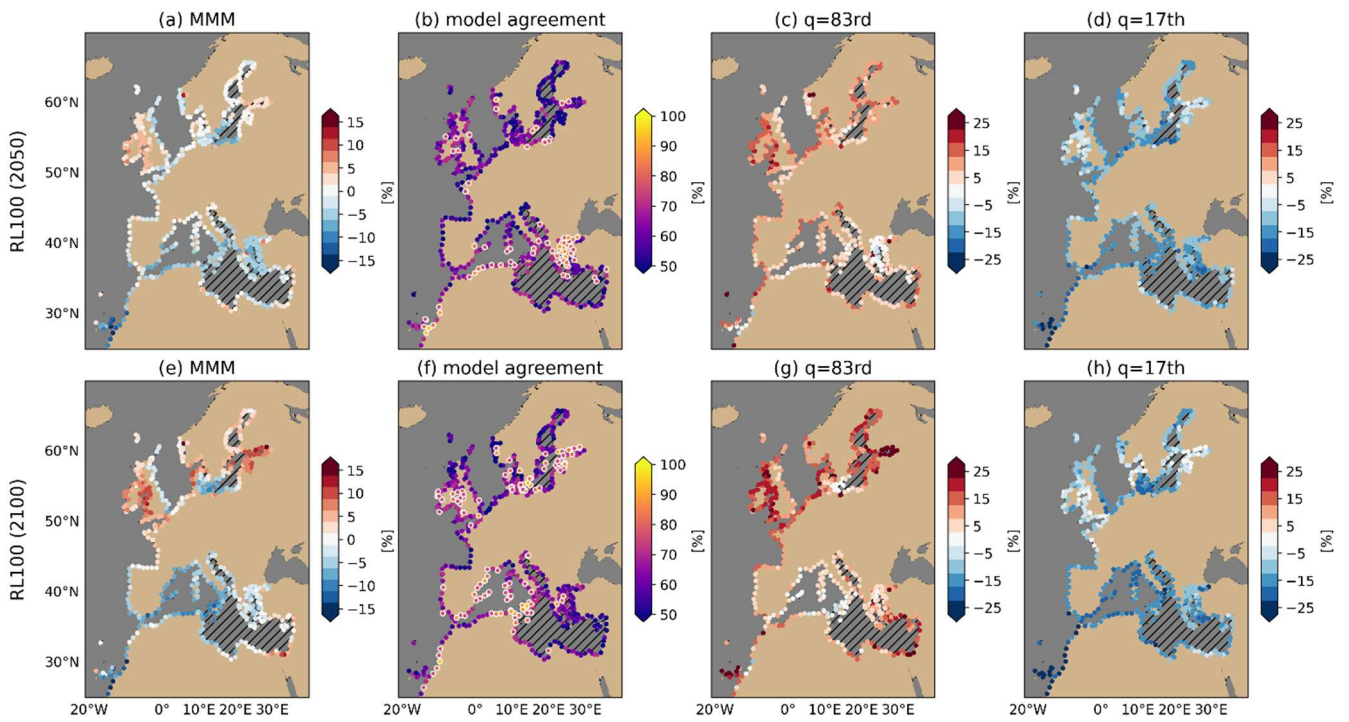

40 **Figure S9 Multi-model mean (MMM) projected changes [%] in the 1 in 100 storm surge return level by middle (a) and end (e)-of the**  
**21st century generated by the hindcast-trained statistical downscaling model (SDM, training period 1997-2021). Corresponding ratio**  
**of models agreeing in the sign of projected changes (b, f), 83rd (c, g) and 17th (d, h) percentiles, indicating the likely range as per**  
**IPCC definitions. Hatching over the eastern Mediterranean Sea and the Baltic Sea indicate lower confidence in statistical projections**  
**in these regions given limited skill of the SDM for both past and future extreme storm surges. Extreme value analysis is computed**  
**for 30-year periods: baseline [1985-2014], middle of the century [2035-2064], and end of the century [2070-2099]. For reference, in**  
**a 17-model ensemble, the 17th and 83rd quantiles correspond to the lower/higher ~3 models. The % model agreement represents**  
**confidence in the sign of projected changes. Those with ratio >80% (here,  $\geq 13/17$  models) are marked with white circle edges in**  
**panels (b,f).**

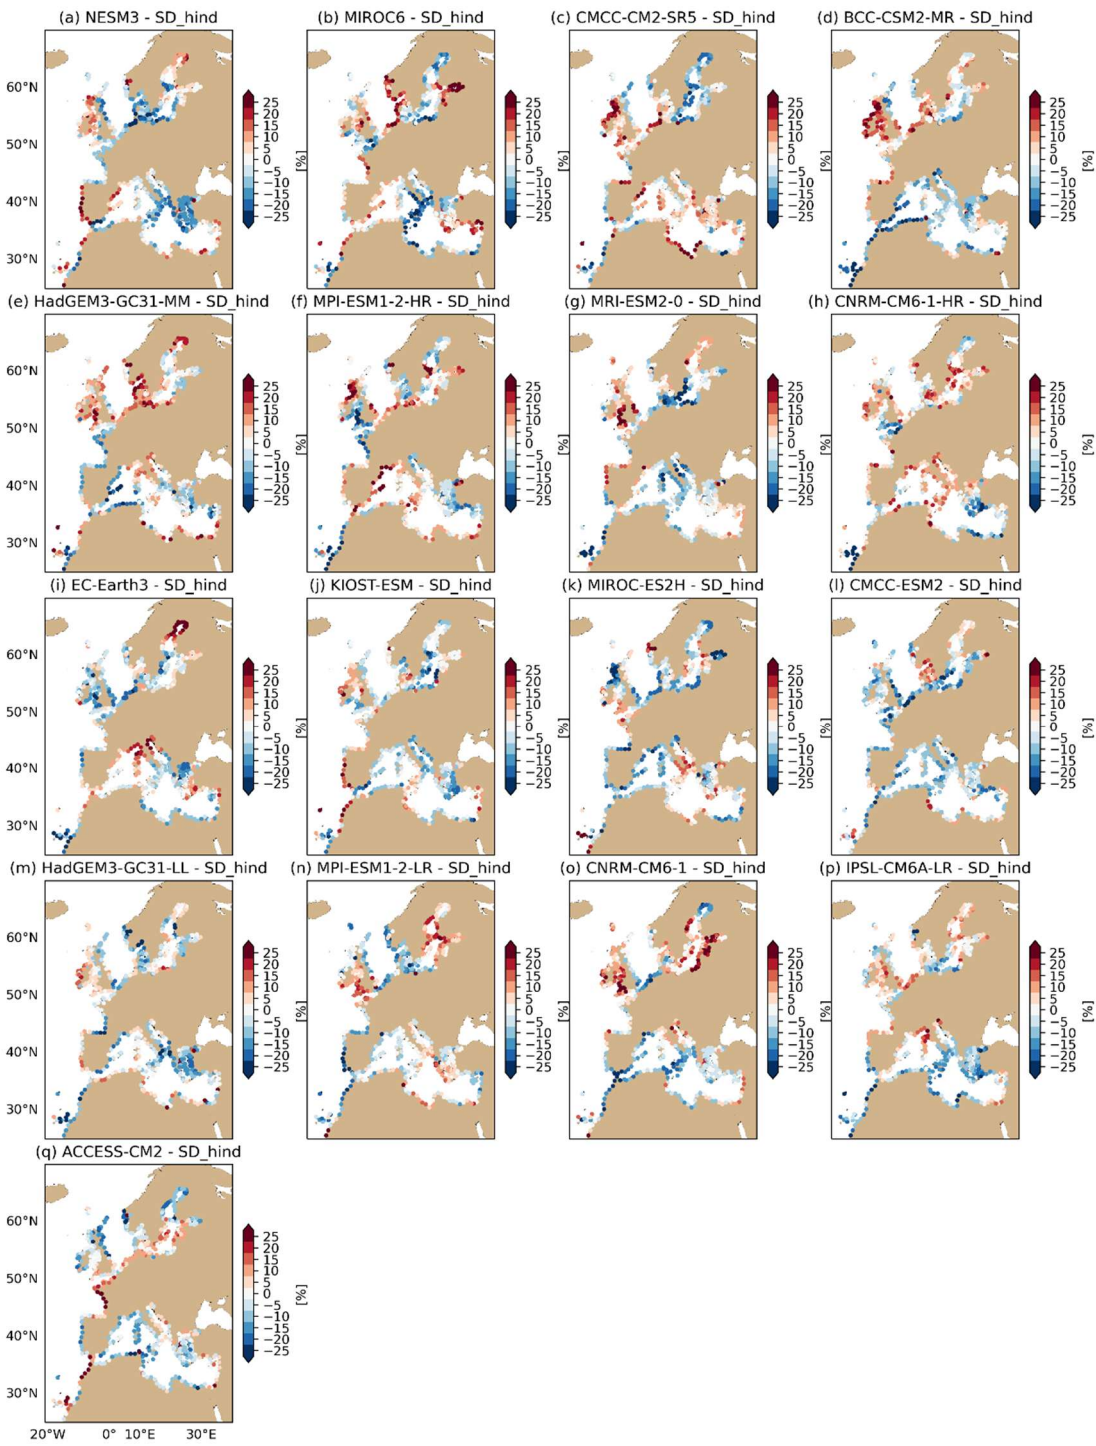

50 **Figure S10** Projections of changes [%] in the storm surge 100-year return level for the middle of the 21st century (stationary extreme value analysis on [2035-2064] vs [1985-2014]) for each of the 17 GCM models in the ensemble.

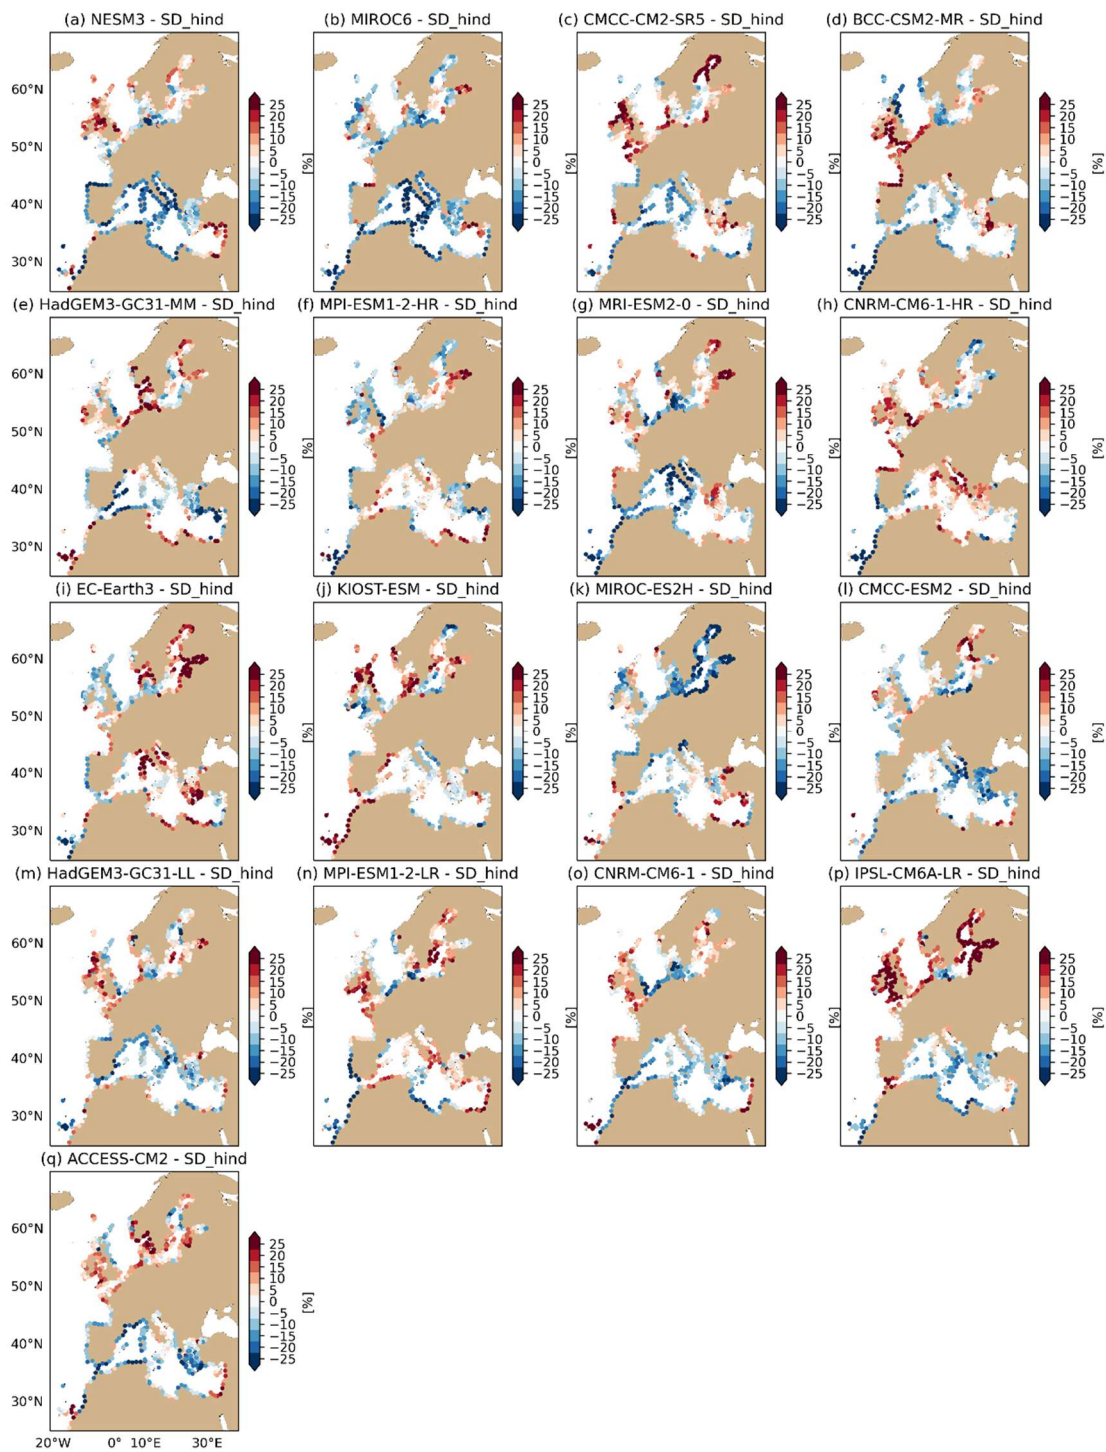

**Figure S11** Projections of changes [%] in the storm surge 100-year return level for the end of the 21st century for SSP5-8.5 (stationary extreme value analysis on [2070-2099] vs [1985-2014]) for each of the 17 GCM models in the ensemble.
